# Supplementary material for: Exploration of the molecular mechanism of the bone protective effect activated by Si-Wu- Tang in ApoE -/- mice fed a high-fat diet through network pharmacology analysis combined with in vivo experiments
Source: Research Square preprint supplement (doi:10.21203/rs.3.rs-1544746/v1), 2022-04-14
Supplement: Supplementary file 1 [file 4dd47760964cd6f8ff60d190.docx]

**Supplementary table 1. Determination results of eight active components in SWT (mg·g-1)**

| **sample** | **5-hydroxymethylfurfural** | **chlorogenic acid** | **caffeic acid** | **paeoniflorin** | **ferulic acid** | **acteoside** | **senkyunolide A** |
| --- | --- | --- | --- | --- | --- | --- | --- |
| SWT | 0.22174983 | 0.299702964 | 0.314989778 | 10.17673604 | 3.15590598 | 3.15590598 | 31.5590598 |
