# Supplementary material for: Exploration of the molecular mechanism of the bone protective effect activated by Si-Wu- Tang in ApoE -/- mice fed a high-fat diet through network pharmacology analysis combined with in vivo experiments
Source: Research Square preprint supplement (doi:10.21203/rs.3.rs-1544746/v1), 2022-04-14

**Supplementary Fig.1**. The HPLC analysis of SWT. S1. The HPLC chromatogram of SWT. S2. The HPLC chromatogram of standard products.


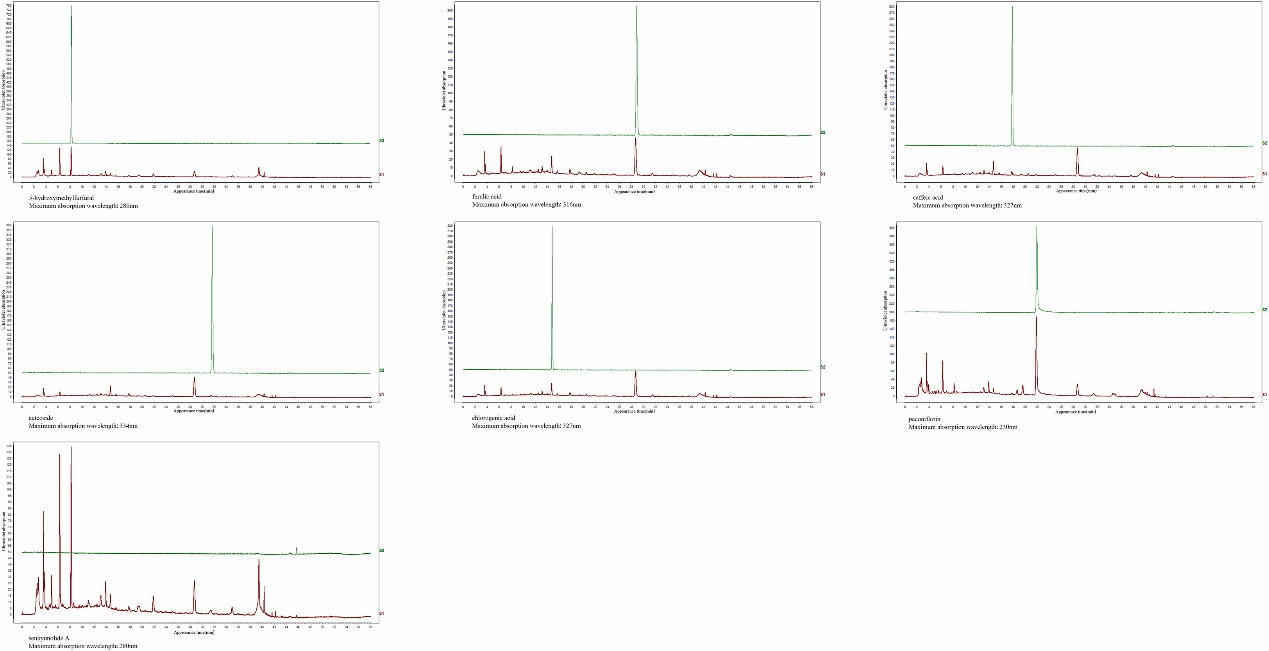

Supplement: Supplementary file 2 [file cf30ea48e51576e7ff33cc35.docx]
